# Supplementary material for: Red clover flavonoids protect against oxidative stress-induced cardiotoxicity in vivo and in vitro
Source: Royal Society of Chemistry journal article supplement (doi:10.1039/c4ra08407a), 2014-10-16
Supplement: c4ra08407a1.pdf [file c4ra08407a1.pdf]

### Supplementary figure 1

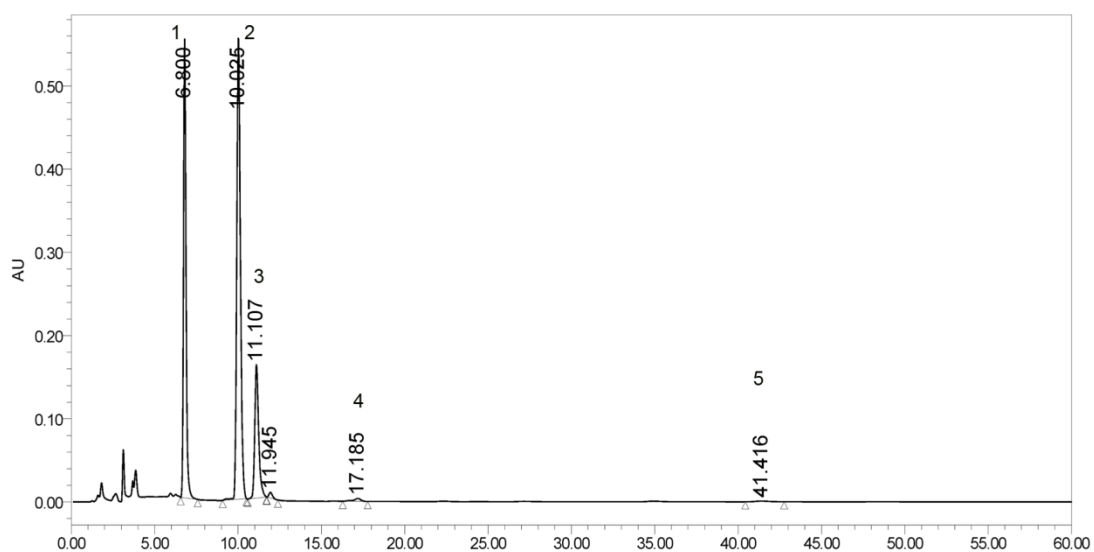

**Supplementary Fig. 1.** The HPLC fingerprint analysis of the red clover flavonoids extract and its main components. And name of the compounds: calycosin (1), genistein (2), kaempferol (3), formononetin (4), and biochanin A (5).

**Table 1. HPLC quantification of red clover flavonoids**

| #Peak | Chemical name | t <sub>R</sub> (min) | Area(mv*s) | Height(mv) | %Area |
|-------|---------------|----------------------|------------|------------|-------|
| 1     | calycosin     | 6.800                | 5808565    | 551029     | 33.81 |
| 2     | genistein     | 10.025               | 8501243    | 556145     | 49.49 |
| 3     | kaempferol    | 11.107               | 2620302    | 160688     | 15.25 |
| 4     | formononetin  | 17.185               | 105006     | 3516       | 0.61  |
| 5     | Biochanin A   | 41.416               | 44367      | 761        | 0.26  |
